# Supplementary material for: Expression of Candidate Marker Genes of Sugar Starvation is Enhanced in Growth-Suppressed Parthenocarpic Cucumber Fruit
Source: Research Square preprint supplement (doi:10.21203/rs.3.rs-1821799/v1), 2022-07-20
Supplement: Supplementary file 1 [file 52b0e9d9fba74d5fec1aa567.docx]

**Table 1** Descriptions of the genes subjected to real-time PCR

1) Cucurbit Genomics Database Cucumber Chinese Long ver.3
